# Supplementary material for: The Human Mesenchymal Stromal Cell-Derived Osteocyte Capacity to Modulate Dendritic Cell Functions Is Strictly Dependent on the Culture System
Source: Hindawi journal article supplement (doi:10.1155/2015/526195), 2015-01-01
Supplement: f1 [file 526195.f1.pdf]

| Donor | Material         | Isolated Cells                            | Condition | Sex | Age |
|-------|------------------|-------------------------------------------|-----------|-----|-----|
| BM58  | bone marrow      | MSC                                       | healthy   | M   | 41  |
| BM65  | bone marrow      | MSC                                       | healthy   | F   | 32  |
| BM66  | bone marrow      | MSC                                       | healthy   | M   | 44  |
| BM71  | bone marrow      | MSC                                       | healthy   | F   | 62  |
| BM79  | bone marrow      | MSC                                       | healthy   | M   | 22  |
| BM81  | bone marrow      | MSC                                       | healthy   | M   | 19  |
| BM82  | bone marrow      | MSC                                       | healthy   | M   | 43  |
| BC41  | peripheral blood | CD3 <sup>+</sup> /CD14 <sup>+</sup> cells | healthy   | M   | 45  |
| BC42  | peripheral blood | CD3 <sup>+</sup> /CD14 <sup>+</sup> cells | healthy   | F   | 52  |
| BC52  | peripheral blood | CD3 <sup>+</sup> /CD14 <sup>+</sup> cells | healthy   | F   | 26  |
| BC55  | peripheral blood | CD3 <sup>+</sup> /CD14 <sup>+</sup> cells | healthy   | M   | 31  |
| BC60  | peripheral blood | CD3 <sup>+</sup> /CD14 <sup>+</sup> cells | healthy   | M   | 47  |
| BC61  | peripheral blood | CD3 <sup>+</sup> /CD14 <sup>+</sup> cells | healthy   | F   | 60  |
| BC62  | peripheral blood | CD3 <sup>+</sup> /CD14 <sup>+</sup> cells | healthy   | M   | 58  |

*Table S1. Characteristics of bone marrow and peripheral blood donors. 7 bone marrow donors (BM58, 65, 66, 71, 79, 81 and 82; F:M ratio, 2:5; median age 41) were used to collect MSC. Seven peripheral blood donors (BC41, 42, 52, 55, 60, 61 and 62; F:M ratio, 3:4; median age 47) were used to collect CD3<sup>+</sup> and CD14<sup>+</sup> cells.*

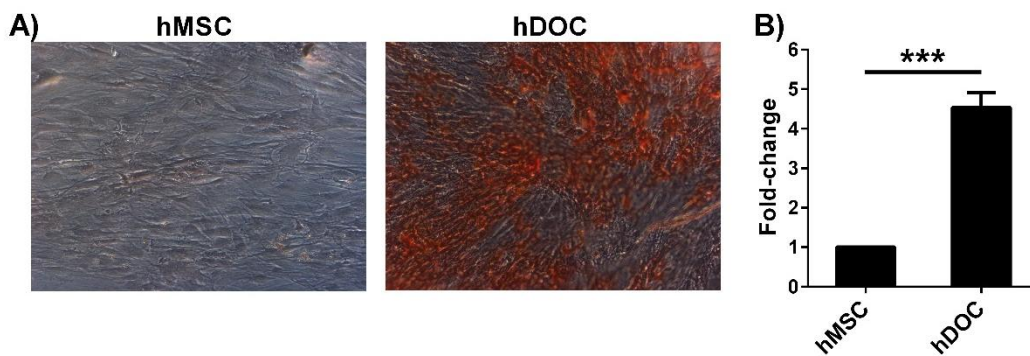

*Figure S1. Evaluation of osteogenic differentiation. hMSC were cultured 2 weeks in DMEM or in osteogenic differentiation medium. Osteogenic differentiation was evaluated by cytological staining through alizarin red staining (A) and by the evaluation of RUNX2 mRNA levels (B). (B) Results are expressed as fold change comparing osteogenic differentiated hDOC with hMSC of 7 independent experiments. \*\*\* = p<0.001.*

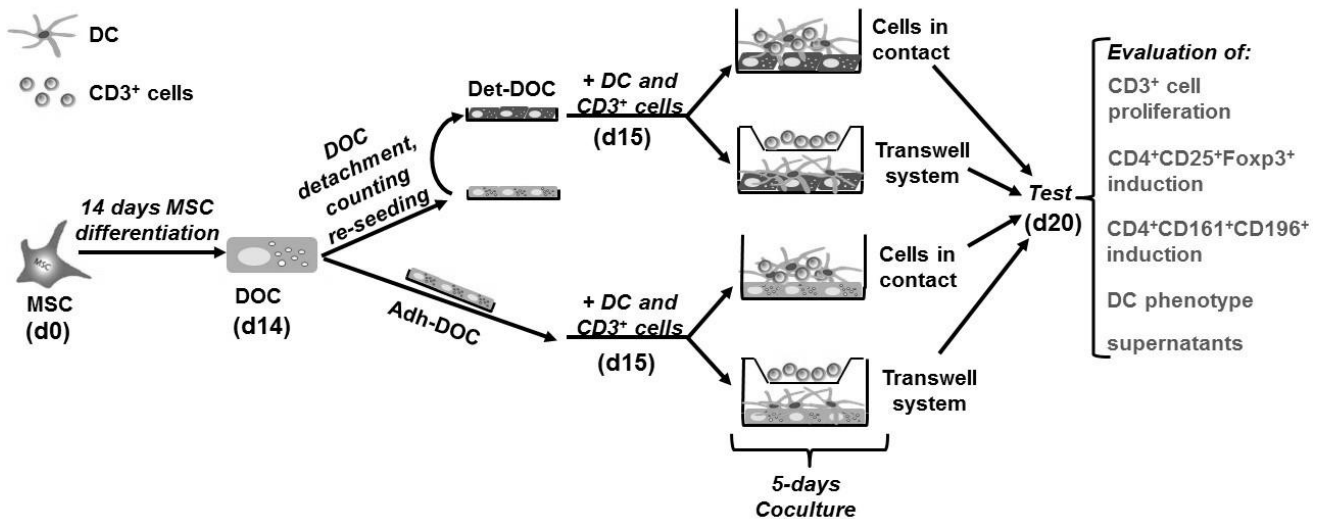

*Figure S2. Schema of the experimental design.* MSC were differentiated for 14 days to obtain DOC. DOC were kept adherent to the plate (Adh-DOC) or detached, counted and re-seeded (Det-DOC). Adh-DOC and Det-DOC were cultured in complete RPMI 1640 for an overnight, then were put in culture for 5 days with DC and CD3<sup>+</sup> cells either in a cell-to-cell contact system, or in a transwell system. At day 20 cells and supernatants were collected to be analyzed.

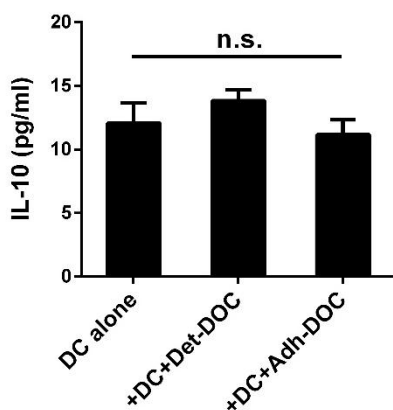

*Figure S3. Quantification of IL-10 in the supernatants of the cocultures.* IL-10 was evaluated in the supernatants of DC cultured for 5 days alone, or with either Det-DOC or Adh-DOC, at a ratio of DC:hDOC of 1:1. Histograms represent the mean  $\pm$  SEM of the cytokine concentration of 7 independent experiments.
